# Supplementary material for: Combined association of obesity and other cardiometabolic diseases with severe COVID-19 outcomes: a nationwide cross-sectional study of 21 773 Brazilian adult and elderly inpatients
Source: HighWire-hosted journal article supplement (doi:10.1136/bmjopen-2021-050739), 2021-08-01
Supplement: bmjopen-2021-050739supp001_data_supplement.pdf [file bmjopen-2021-050739supp001_data_supplement.pdf]

**Suppl. Table 1.** Characteristics of the study population and study samples included and excluded of the analysis for each severe COVID-19 outcome.

|                                     | Study population* |       | Mechanical ventilation |      |          |      | ICU admission |      |          |      | Death    |      |          |      |
|-------------------------------------|-------------------|-------|------------------------|------|----------|------|---------------|------|----------|------|----------|------|----------|------|
|                                     | n                 | %     | Included               |      | Excluded |      | Included      |      | Excluded |      | Included |      | Excluded |      |
|                                     | n                 | %     | n                      | %    | n        | %    | n             | %    | n        | %    | n        | %    | n        | %    |
| Overall                             | 21,773            | 100.0 | 19,904                 | 91.4 | 1,869    | 8.6  | 20,636        | 94.8 | 1,137    | 5.2  | 16,508   | 75.8 | 5,265    | 24.2 |
| <b>Sex</b>                          |                   |       |                        |      |          |      |               |      |          |      |          |      |          |      |
| Female                              | 9,742             | 44.7  | 8,905                  | 44.7 | 837      | 44.8 | 9,227         | 44.7 | 515      | 45.3 | 7,379    | 44.7 | 2,363    | 44.9 |
| Male                                | 12,031            | 55.3  | 10,999                 | 55.3 | 1,032    | 55.2 | 11,409        | 55.3 | 622      | 54.7 | 9,129    | 55.3 | 2,902    | 55.1 |
| <b>Age (years)</b>                  |                   |       |                        |      |          |      |               |      |          |      |          |      |          |      |
| 20-39                               | 1,976             | 9.1   | 1,808                  | 9.1  | 168      | 9.0  | 1,890         | 9.2  | 86       | 7.6  | 1,445    | 8.8  | 531      | 10.1 |
| 40-59                               | 6,872             | 31.6  | 6,267                  | 31.5 | 605      | 32.4 | 6,524         | 31.6 | 348      | 30.6 | 5,120    | 31.0 | 1,752    | 33.3 |
| 60-79                               | 9,355             | 43.0  | 8,546                  | 42.9 | 809      | 43.3 | 8,827         | 42.8 | 528      | 46.4 | 7,062    | 42.8 | 2,293    | 43.6 |
| >= 80                               | 3,570             | 16.4  | 3,283                  | 16.5 | 287      | 15.4 | 3,395         | 16.5 | 175      | 15.4 | 2,881    | 17.5 | 689      | 13.1 |
| <b>Obesity</b>                      |                   |       |                        |      |          |      |               |      |          |      |          |      |          |      |
| No                                  | 20,463            | 94.0  | 18,661                 | 93.8 | 1,802    | 96.4 | 19,366        | 93.9 | 1,097    | 96.5 | 15,533   | 94.1 | 4,930    | 93.6 |
| Yes                                 | 1,310             | 6.0   | 1,243                  | 6.2  | 67       | 3.6  | 1,270         | 6.2  | 40       | 3.5  | 975      | 5.9  | 335      | 6.4  |
| <b>Diabetes</b>                     |                   |       |                        |      |          |      |               |      |          |      |          |      |          |      |
| No                                  | 13,058            | 60.0  | 11,925                 | 59.9 | 1,133    | 60.6 | 12,401        | 60.1 | 657      | 57.8 | 9,925    | 60.1 | 3,133    | 59.5 |
| Yes                                 | 8,715             | 40.0  | 7,979                  | 40.1 | 736      | 39.4 | 8,235         | 39.9 | 480      | 42.2 | 6,583    | 39.9 | 2,132    | 40.5 |
| <b>Cardiovascular disease</b>       |                   |       |                        |      |          |      |               |      |          |      |          |      |          |      |
| No                                  | 10,391            | 47.7  | 9,400                  | 47.2 | 991      | 53.0 | 9,858         | 47.8 | 533      | 46.9 | 7,866    | 47.7 | 2,525    | 48.0 |
| Yes                                 | 11,382            | 52.3  | 10,504                 | 52.8 | 878      | 47.0 | 10,778        | 52.2 | 604      | 53.1 | 8,642    | 52.4 | 2,740    | 52.0 |
| <b>Chronic pulmonary disease</b>    |                   |       |                        |      |          |      |               |      |          |      |          |      |          |      |
| No                                  | 20,387            | 93.6  | 18,630                 | 93.6 | 1,757    | 94.0 | 19,306        | 93.6 | 1,081    | 95.1 | 15,422   | 93.4 | 4,965    | 94.3 |
| Yes                                 | 1,386             | 6.4   | 1,274                  | 6.4  | 112      | 6.0  | 1,330         | 6.5  | 56       | 4.9  | 1,086    | 6.6  | 300      | 5.7  |
| <b>Asthma</b>                       |                   |       |                        |      |          |      |               |      |          |      |          |      |          |      |
| No                                  | 20,658            | 94.9  | 18,897                 | 94.9 | 1,761    | 94.2 | 19,571        | 94.8 | 1,087    | 95.6 | 15,666   | 94.9 | 4,992    | 94.8 |
| Yes                                 | 1,115             | 5.1   | 1,007                  | 5.1  | 108      | 5.8  | 1,065         | 5.2  | 50       | 4.4  | 842      | 5.1  | 273      | 5.2  |
| <b>Chronic kidney disease</b>       |                   |       |                        |      |          |      |               |      |          |      |          |      |          |      |
| No                                  | 20,179            | 92.7  | 18,420                 | 92.5 | 1,759    | 94.1 | 19,106        | 92.6 | 1,073    | 94.4 | 15,255   | 92.4 | 4,924    | 93.5 |
| Yes                                 | 1,594             | 7.3   | 1,484                  | 7.5  | 110      | 5.9  | 1,530         | 7.4  | 64       | 5.6  | 1,253    | 7.6  | 341      | 6.5  |
| <b>Chronic hematologic disease</b>  |                   |       |                        |      |          |      |               |      |          |      |          |      |          |      |
| No                                  | 21,438            | 98.5  | 19,597                 | 98.5 | 1,841    | 98.5 | 20,313        | 98.4 | 1,125    | 98.9 | 16,245   | 98.4 | 5,193    | 98.6 |
| Yes                                 | 335               | 1.5   | 307                    | 1.5  | 28       | 1.5  | 323           | 1.6  | 12       | 1.1  | 263      | 1.6  | 72       | 1.4  |
| <b>Chronic neurological disease</b> |                   |       |                        |      |          |      |               |      |          |      |          |      |          |      |
| No                                  | 20,459            | 94.0  | 18,700                 | 94.0 | 1,759    | 94.1 | 19,377        | 93.9 | 1,082    | 95.2 | 15,460   | 93.7 | 4,999    | 95.0 |
| Yes                                 | 1,314             | 6.0   | 1,204                  | 6.1  | 110      | 5.9  | 1,259         | 6.1  | 55       | 4.8  | 1,048    | 6.4  | 266      | 5.1  |

|                              |        |      |        |      |       |      |        |      |       |      |        |      |       |      |
|------------------------------|--------|------|--------|------|-------|------|--------|------|-------|------|--------|------|-------|------|
| <b>Chronic liver disease</b> |        |      |        |      |       |      |        |      |       |      |        |      |       |      |
| No                           | 21,418 | 98.4 | 19,581 | 98.4 | 1,837 | 98.3 | 20,300 | 98.4 | 1,118 | 98.3 | 16,218 | 98.2 | 5,200 | 98.8 |
| Yes                          | 355    | 1.6  | 323    | 1.6  | 32    | 1.7  | 336    | 1.6  | 19    | 1.7  | 290    | 1.8  | 65    | 1.2  |
| <b>Immunosuppression</b>     |        |      |        |      |       |      |        |      |       |      |        |      |       |      |
| No                           | 20,579 | 94.5 | 18,792 | 94.4 | 1,787 | 95.6 | 19,485 | 94.4 | 1,094 | 96.2 | 15,571 | 94.3 | 5,008 | 95.1 |
| Yes                          | 1,194  | 5.5  | 1,112  | 5.6  | 82    | 4.4  | 1,151  | 5.6  | 43    | 3.8  | 937    | 5.7  | 257   | 4.9  |

**Suppl. Table 2.** Combined association of obesity, diabetes, and/or cardiovascular disease with death in adult and elderly patients hospitalized with severe COVID-19, excluding the cases of chronic pulmonary diseases and immunosuppression.

|                              | Main exposure variable | Death* |           |
|------------------------------|------------------------|--------|-----------|
|                              |                        | PR     | 95%CI     |
| <b>Adults</b><br>20-59 years | None                   | 1.00   |           |
|                              | OB                     | 1.38   | 1.07-1.79 |
|                              | OB + DM and/or CVD     | 1.86   | 1.49-2.32 |
|                              | DM and/or CVD          | 1.16   | 1.03-1.32 |
| <b>Elders</b><br>≥ 60 years  | None                   | 1.00   |           |
|                              | OB                     | 1.64   | 0.99-2.82 |
|                              | OB + DM and/or CVD     | 1.43   | 1.08-1.90 |
|                              | DM and/or CVD          | 1.05   | 0.94-1.17 |

OB: obesity (BMI $\geq$ 30 kg/m<sup>2</sup>), DM: diabetes mellitus, CVD: cardiovascular disease, ICU: intensive care unit, PR: prevalence ratio, 95%CI: 95% confidence interval.

# Adjusted for sex, age in years, asthma, kidney disease, hematologic disease, neurological disease, and liver disease.

\* Adjusted logistic regression model for death in adults (n=5889) and elders (n=8676).

**Suppl. Table 3.** Independent association of degrees of obesity with death in hospitalized adults with severe COVID-19, excluding the cases of chronic pulmonary disease and immunosuppression.

| Main exposure variable                          | Death* |           |
|-------------------------------------------------|--------|-----------|
|                                                 | PR     | 95%CI     |
| No obesity (< 30 kg/m <sup>2</sup> )            | 1.00   |           |
| Obesity class I (≥ 30-34.9 kg/m <sup>2</sup> )  | 1.39   | 1.09-1.77 |
| Obesity class II (≥ 35-39.9 kg/m <sup>2</sup> ) | 1.48   | 1.10-1.99 |
| Obesity class III (≥ 40 kg/m <sup>2</sup> )     | 1.79   | 1.34-2.41 |

Degrees of obesity defined by the WHO cutoff points.

PR: prevalence ratio, 95%CI: 95% confidence interval.

\* Adjusted logistic regression model for death (n=5889).

# Adjusted for sex, age in years, diabetes mellitus, cardiovascular disease, asthma, kidney disease, hematologic disease, neurological disease, and liver disease.
